# Supplementary material for: Development of the Scores for Traditional and Modified Japanese Diets
Source: MDPI journal article supplement (doi:10.3390/nu15143146), 2023-07-14
Supplement: s1 [file s1]

**Supplementary Table S1.** Number (percentage) of people who achieved the cutoff for each component food/food group according to the quartiles of the traditional Japanese diet score

| Food/food group                | Traditional Japanese diet score |        |             |        |             |        |             |        |
|--------------------------------|---------------------------------|--------|-------------|--------|-------------|--------|-------------|--------|
|                                | Q1                              |        | Q2          |        | Q3          |        | Q4          |        |
|                                | (n = 4,630)                     |        | (n = 2,008) |        | (n = 3,243) |        | (n = 2,879) |        |
| White rice                     | 1,055                           | (22.8) | 941         | (46.9) | 1,737       | (53.6) | 1,904       | (66.1) |
| Miso soup                      | 625                             | (13.5) | 833         | (41.5) | 2,001       | (61.7) | 2,382       | (82.7) |
| Soybean products               | 804                             | (17.4) | 896         | (44.6) | 2,148       | (66.2) | 2,616       | (90.9) |
| Vegetables <sup>1</sup>        | 286                             | (6.2)  | 423         | (21.1) | 1,406       | (42.4) | 2,290       | (79.5) |
| Mushrooms                      | 169                             | (3.7)  | 268         | (13.4) | 1,025       | (31.6) | 2,167       | (75.3) |
| Seaweeds                       | 125                             | (2.7)  | 240         | (12.0) | 968         | (29.9) | 2,174       | (75.5) |
| Fish and shellfish             | 391                             | (8.4)  | 517         | (25.8) | 1,409       | (43.5) | 2,235       | (77.6) |
| High-sodium foods <sup>2</sup> | 1,189                           | (25.7) | 970         | (48.3) | 1,942       | (59.9) | 2,317       | (80.5) |
| Green tea                      | 1,295                           | (28.0) | 936         | (46.6) | 1,786       | (55.1) | 1,988       | (69.1) |

<sup>1</sup>Including only cooked vegetables (e.g., dishes with lots of vegetables and soups).

<sup>2</sup>Including pickled plums, pickled vegetables, dried fish, salted fish, and fish roe.

Figures are numbers (percentages) unless otherwise stated.

Abbreviations: Q: quartiles

**Supplementary Table S2.** Number (percentage) of people who achieved the cutoff for each component food/food group according to the quartiles of the modified Japanese diet score

| Food/food group                | Modified Japanese Diet Score |                   |                   |                   |
|--------------------------------|------------------------------|-------------------|-------------------|-------------------|
|                                | Q1<br>(n = 3,701)            | Q2<br>(n = 3,850) | Q3<br>(n = 2,913) | Q4<br>(n = 2,296) |
| Whole grains <sup>1</sup>      | 204 (5.5)                    | 534 (13.9)        | 532 (18.3)        | 761 (33.1)        |
| Miso soup                      | 500 (13.5)                   | 1,649 (42.8)      | 1,801 (61.8)      | 1,891 (82.4)      |
| Soybean products               | 488 (13.2)                   | 1,755 (45.6)      | 2,093 (71.9)      | 2,128 (92.7)      |
| Vegetables <sup>2</sup>        | 274 (7.4)                    | 1,465 (38.1)      | 2,114 (72.6)      | 2,150 (93.6)      |
| Mushrooms                      | 89 (2.4)                     | 542 (14.1)        | 1,195 (41.0)      | 1,803 (78.5)      |
| Seaweeds                       | 85 (2.3)                     | 511 (13.3)        | 1,125 (38.6)      | 1,786 (77.8)      |
| Fruits                         | 172 (4.7)                    | 701 (18.2)        | 1,143 (39.2)      | 1,630 (71.0)      |
| Fish and shellfish             | 264 (7.1)                    | 962 (25.0)        | 1,475 (50.6)      | 1,851 (80.6)      |
| Milk and dairy products        | 393 (10.6)                   | 1,334 (34.7)      | 1,448 (49.7)      | 1,648 (71.8)      |
| High-sodium foods <sup>3</sup> | 1,899 (51.3)                 | 2,148 (55.8)      | 1,388 (47.7)      | 907 (39.5)        |
| Green tea                      | 996 (26.9)                   | 1,793 (46.6)      | 1,607 (55.2)      | 1,609 (70.1)      |

<sup>1</sup>Including rice mixed with millet and barley, brown rice, germinated rice, under- or half-milled rice

<sup>2</sup>Including cooked vegetables, raw vegetables, and 100% vegetable juices.

<sup>3</sup>Including pickled plums, pickled vegetables, dried fish, salted fish, and fish roe. Reversal item.

Abbreviations: Q: quartiles

**Supplementary Table S3.** Summary of existing scoring systems of Japanese diet

|                       | Japanese Food Guide<br>Spinning Top [3][14] | Reduced-Salt Japanese Diet<br>Score [4] | Japanese Diet Index<br>[5][6]                 | Japanese Food Score[8]                          | Japanese Healthy Diet<br>Index [7]                                                                                                            |
|-----------------------|---------------------------------------------|-----------------------------------------|-----------------------------------------------|-------------------------------------------------|-----------------------------------------------------------------------------------------------------------------------------------------------|
| Grains                | Grain dishes:<br>5-7 SV                     | NA                                      | Rice: $\geq$ median                           | NA                                              | Rice: $\geq$ median<br>Bread: <median                                                                                                         |
| Potatoes              | Vegetable dishes:<br>5-6 SV                 | NA                                      | NA                                            | NA                                              | NA                                                                                                                                            |
| Vegetables            |                                             | NA                                      | Green and yellow<br>vegetables: $\geq$ median | Vegetables:<br>$\geq 3-4$ times/week            | Green vegetables:<br>$\geq$ median<br>Red/yellow vegetables:<br>$\geq$ median<br>White vegetables: $\geq$ median<br>Vegetable juices: <median |
| Seaweeds              |                                             | NA                                      | Seaweeds: $\geq$ median                       | Seaweeds:<br>$\geq 3-4$ times/week              | NA                                                                                                                                            |
| Mushrooms             |                                             | NA                                      | NA                                            | Mushrooms:<br>$\geq 3-4$ times/week             | NA                                                                                                                                            |
| Pickles               | NA                                          | Japanese pickles:<br>$\geq 1$ time/day  | Pickles: $\geq$ median                        | Japanese pickles:<br>$\geq 3-4$ times/week      | NA                                                                                                                                            |
| Fruits                | Fruits: 2 SV                                | NA                                      | NA                                            | Fruits:<br>$\geq 3-4$ times/week                | Fruits: $\geq$ median<br>Fruit juices: <median                                                                                                |
| Pulses <sup>1</sup>   | Fish and Meat dishes: 3-5 SV                | NA                                      | NA                                            | Boiled beans and tofu:<br>$\geq 3-4$ times/week | Tofu: $\geq$ median<br>Fermented beans: $\geq$ median<br>Boiled beans: $\geq$ median<br>Soybean milk: <median                                 |
| Fish and<br>shellfish |                                             | Fish: $\geq 1$ time/2 days              | Fish: $\geq$ median                           | Fresh fish:<br>$\geq 3-4$ times/week            | Fish: $\geq$ median                                                                                                                           |
| Meats                 |                                             | Meats: $\leq 2$ times/week              | Beef and pork: <median                        | NA                                              | Beef and pork: <median<br>Chicken: <median<br>Ham: <median                                                                                    |
| Eggs                  |                                             | Eggs: $\leq 2$ eggs/week                | NA                                            | NA                                              | NA                                                                                                                                            |
| Dairy                 | Milk: 2 SV                                  | NA                                      | NA                                            | NA                                              | Milk: <median<br>Yogurt: <median                                                                                                              |
| Fat and oil           | NA                                          | NA                                      | NA                                            | NA                                              | NA                                                                                                                                            |

**Supplementary Table S3.** (continue)

|                          | Japanese Food Guide<br>Spinning Top [3][14]     | Reduced-Salt Japanese Diet<br>Score [4]                      | Japanese Diet Index<br>[5][6]                 | Japanese Food Score[8]            | Japanese Healthy Diet<br>Index [7]         |
|--------------------------|-------------------------------------------------|--------------------------------------------------------------|-----------------------------------------------|-----------------------------------|--------------------------------------------|
| Confectioneries          | Snacks,confections,<br>and beverages: ≤200 kcal | NA                                                           | NA                                            | NA                                | NA                                         |
| Alcohol                  |                                                 | Occasional drinking: yes                                     | NA                                            | NA                                | NA                                         |
| Non-alcohol<br>beverages |                                                 | NA                                                           | Green tea: ≥median<br>Coffee: <median         | NA                                | NA                                         |
| Soup                     | NA                                              | Infrequent intake of soup<br>with noodles: yes               | Miso soup: ≥ median                           | NA                                | Miso soup: ≥ median                        |
| Seasonings               | NA                                              | Use of low-salt soya sauce:<br>yes                           | NA                                            | NA                                | NA                                         |
| Energy                   | Energy:<br>2200±200 kcal                        | NA                                                           | NA                                            | NA                                | NA                                         |
| Total score              | 0-70                                            | 0-7                                                          | 0-9                                           | 0-7                               | 1-19                                       |
| Purpose                  | Promote healthy diet                            | Extract the beneficial<br>components of the Japanese<br>diet | Characterize the traditional<br>Japanese diet | Characterize the Japanese<br>diet | Assess the quality of the<br>Japanese diet |
| Population               | Children and adults                             | NIPPON DATA80                                                | Ohsaki cohort                                 | JACC study                        | Fukushima Health<br>Management Survey      |
| Component<br>selection   | NA                                              | NA                                                           | Dietary pattern analysis                      | Dietary pattern analysis          | Dietary pattern analysis                   |
| Cutoff<br>definition     | NA                                              | Association with mortality                                   | Sex-specific median                           | Common frequency                  | Median                                     |

<sup>1</sup>In the Japanese Food Table Spinning Top, soybeans and soy products are included in “Fish and Meat dishes”, while pulse except soybeans are included in “Vegetable dishes”.
